# Supplementary material for: Zn(ii) assisted synthesis of porous salen as an efficient heterogeneous scaffold for capture and conversion of CO2
Source: Royal Society of Chemistry journal article supplement (doi:10.1039/c5cc06868a), 2015-01-01
Supplement: c5cc06868a1.pdf [file c5cc06868a1.pdf]

## **Zn(II) assisted synthesis of porous salen as an efficient heterogeneous scaffold for capture and conversion of CO<sub>2</sub>**

Subhajit Bhunia, Rostam Ali Molla, Vandana Kumari, Sk. Manirul Islam and Asim Bhaumik\*

\*Corresponding author

E-mail: [msab@iacs.res.in](mailto:msab@iacs.res.in)

Fax: +91-33-2473-2805;

Tel: +91-33-2473-4971

## Table of Contents

|                   |                                                                                                                                                                                                               |
|-------------------|---------------------------------------------------------------------------------------------------------------------------------------------------------------------------------------------------------------|
| <b>Section S1</b> | Details of chemicals used, equipments employed and experimental procedure for the synthesis of Zn@SBMMP.                                                                                                      |
| <b>Figure S1</b>  | Optimization of BET surface area with varying amount of zinc acetate.                                                                                                                                         |
| <b>Figure S2</b>  | Wide angle powder XRD pattern of Zn@SBMMP.                                                                                                                                                                    |
| <b>Figure S3</b>  | IR- spectra of 3,3' diaminobenzidine (3,3' DAB), diformyl phloroglucinol (DFP) and Zn@SBMMP.                                                                                                                  |
| <b>Figure S4</b>  | Energy dispersive X-ray(EDX) analysis data of Zn@SBMMP.                                                                                                                                                       |
| <b>Figure S5</b>  | N <sub>2</sub> adsorption/desorption isotherms of Zn@SBMMP. Adsorption points are marked by filled circles and desorption points by empty circles. Pore sized distribution of Zn@SBMMP is shown in the inset. |
| <b>Figure S6</b>  | Solid state UV-Visible spectrum of Zn@SBMMP(A) and band gap (B) and photograph of dark red colored powdered material (C).                                                                                     |
| <b>Figure S7</b>  | CO <sub>2</sub> adsorption isotherm at 273 K and 300 K by Zn@SBMMP upto 3 bar.                                                                                                                                |
| <b>Figure S8</b>  | Thermogravimetric analysis (TGA) of Zn@SBMMP.                                                                                                                                                                 |
| <b>Section S2</b> | Optimization of CO <sub>2</sub> capture and conversion efficiency of Zn@SBMMP for styrene oxide (SO).                                                                                                         |
| <b>Section S3</b> | Catalytic experimental procedure, recyclability test with (A) or without solvent (B), variation of yield with temperature (C) and pressure (D) and turn over number calculation.                              |
| <b>Figure S9</b>  |                                                                                                                                                                                                               |
| <b>Figure S10</b> | Proposed mechanistic pathway for the synthesis of cyclic carbonate over Zn@SBMMP.                                                                                                                             |
| <b>Section S4</b> | Comperision of Zn@SBMMP with other heterogenous and homogeneous catalysts.                                                                                                                                    |
| <b>Figure S11</b> |                                                                                                                                                                                                               |
| <b>Section S5</b> | <sup>1</sup> H NMR data of cyclic carbonates.                                                                                                                                                                 |
| <b>Section S6</b> | Some representative <sup>1</sup> H NMR data of cyclic carbonates.                                                                                                                                             |
| <b>Section S7</b> | References.                                                                                                                                                                                                   |



## Section S1

### Chemicals

3,3'-diaminobenzidine (sigma aldrich, 99%); phloroglucinol anhydrous (spectrochem, +98%); anhydrous N,N-dimethyl formamide (DMF) (spectrochem, +99%); phosphorous oxychloride (Spectrochem, +99%); 1,4 dioxane (Merck, +99%); terminal epoxides: styrene oxide (Alfa Aesar, +98%), (±)-epichlorohydrin (Alfa Aesar, +98%), (±)-propylene oxide, 99+%; 1,2-epoxy-3 phenoxypropane (sigma Aldrich, 99%); butyl glycidyl ether (Alfa Aesar, 95%); allyl glycidyl ether (spectrochem, +99%); (S)- (-)-glycidol (Alfa Aesar, ee +99%) was used as received. 2,4,6-trihydroxyisophthalaldehyde was synthesized by the previously reported procedure.<sup>[1]</sup>

### Characterizations

<sup>1</sup>H and <sup>13</sup>C NMR experiments (liquid state) were carried out on a Bruker DPX-300 NMR spectrometer. Carbon, hydrogen and nitrogen contents of Zn@SBMMP were analyzed using a Perkin Elmer 2400 Series II CHN analyzer. X-Ray diffraction patterns of the powder samples were obtained with a Bruker AXS D<sub>8</sub> Advanced SWAX diffractometer using Cu K $\alpha$  (= 0.15406 nm) radiation. Nitrogen sorption experiments and micropore analysis was conducted at 77 K using Autosorb 1 (quantachrome, USA). Prior to adsorption measurement the samples were degassed in vacuum at 150°C for about 10 h. NLDT pore-size distributions were determined from the sorption isotherms by using the carbon/slit-cylindrical pore model. The <sup>13</sup>C cross-polarization magic angle spinning (CP-MAS) NMR spectrum was obtained on a 500 MHz Bruker Avance II spectrometer at a magic frequency of 8 kHz. Thermogravimetry (TG) and differential thermal analyses (DTA) of the samples are carried out in a TGA Instruments thermal

analyzer TA-SDT Q-600. A Hitachi S-5200 field-emission scanning electron microscope was used for the determination of the morphology of the particles. Transmission electron microscopy (TEM) images were obtained using a JEOL JEM 2010 transmission electron microscope operating at 200 kV. The samples were prepared by dropping a colloidal solution onto the carbon-coated copper grids followed by drying under high vacuum. For the bulk elemental analysis the Zn@SBMMP was digested with acid to dissolve them into clear liquid and then Zn content was analyzed by using a Shimadzu AA-6300 atomic absorption spectrophotometer (AAS) fitted with a double beam monochromator. The reaction mixtures of the catalytic reactions were analyzed by capillary gas chromatography (Agilent Model 4890D, using a gas chromatograph equipped with a flame ionization detection (FID) device). Synthesis of cyclic carbonate was carried out by 100 ml stainless steel autoclave fitted with high pressure reactor (Amar equipments, Mumbai, India).

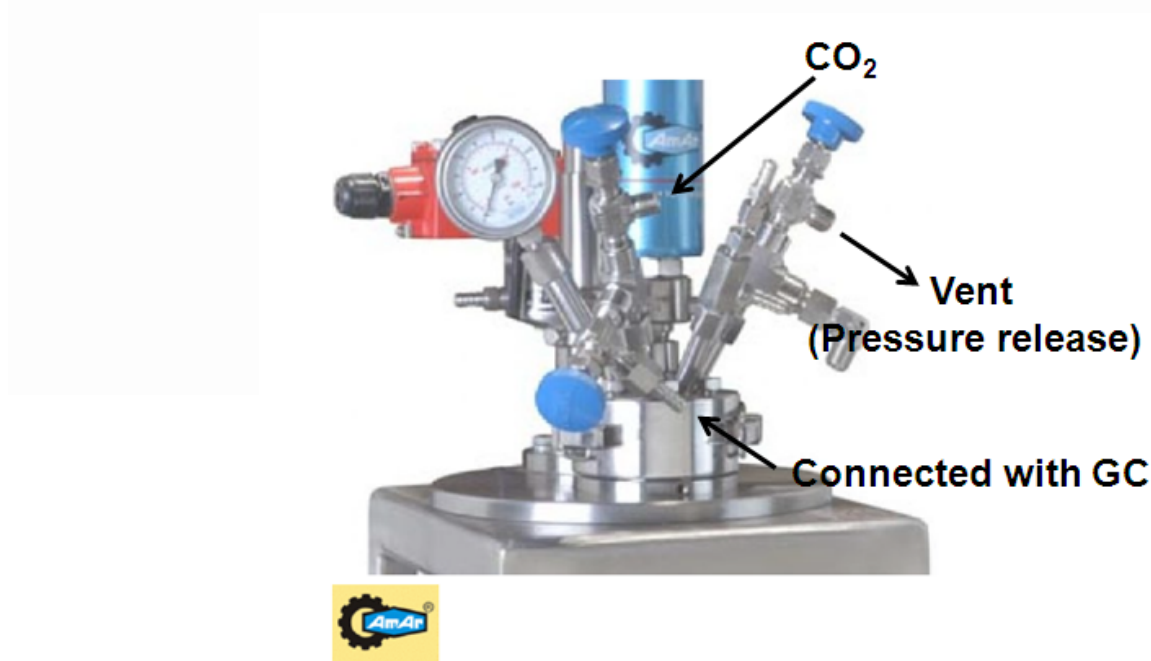

### **Experimental procedure for synthesis of Zn@SBMMP catalyst**

A schlenk flask was charged with 0.025 mmol 3,3'-diaminobenzidine (36 mg), 0.5 mmol phloroglucinol-dialdehyde (344 mg),  $\text{Zn}(\text{OAc})_2 \cdot 2\text{H}_2\text{O}$  (1.0 mmol) and 100 ml anhydrous DMF under  $\text{N}_2$  atmosphere and stirred for 24 h. Then the dark red sol was transferred to a Teflon lined stainless steel autoclave and heated at 180 °C for 3 days continuously. Then the reaction mixture was poured into large amount of acetone and filtered. The red solid has been designated as Zn@SBMMP and dried in an air oven overnight.

Figure S1

Optimization of BET surface area with varying amount of zinc acetate

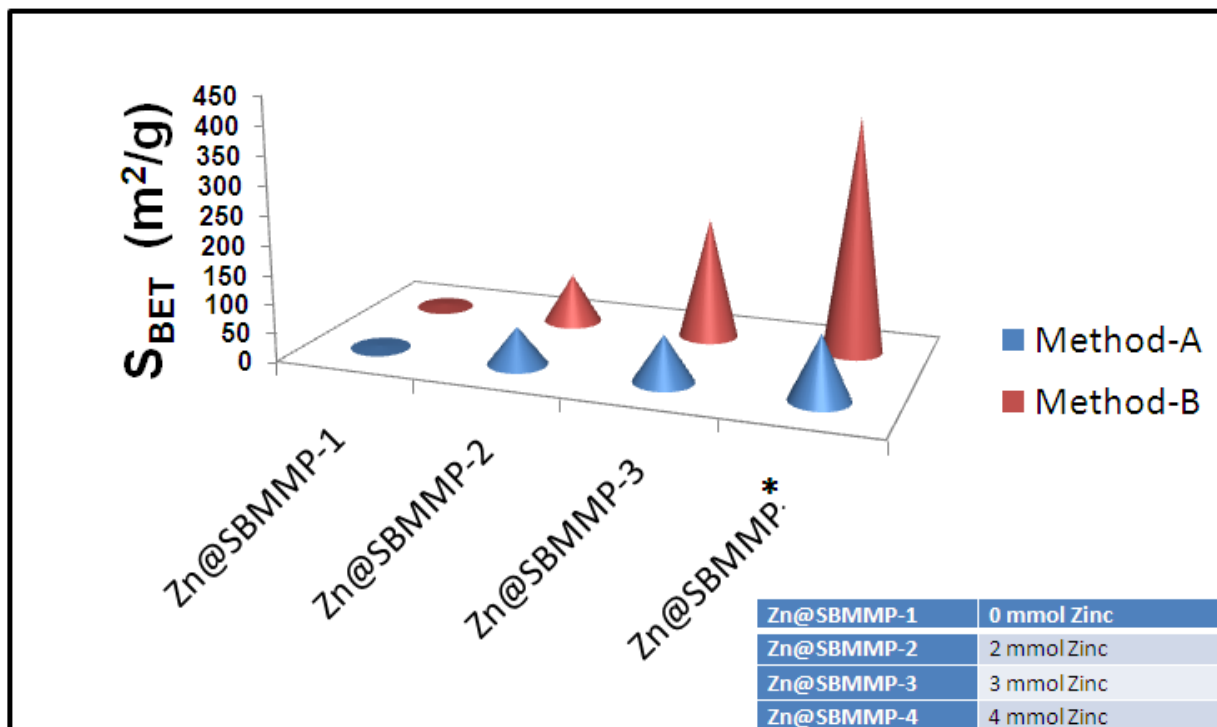

**Figure S1. Method A.** Zn@SBMMP was synthesized by one step process.

**Method B.** Zn@SBMMP was synthesized by two step process.

\*This material is optimized material and each characterization had been studied using this material.

Figure S2

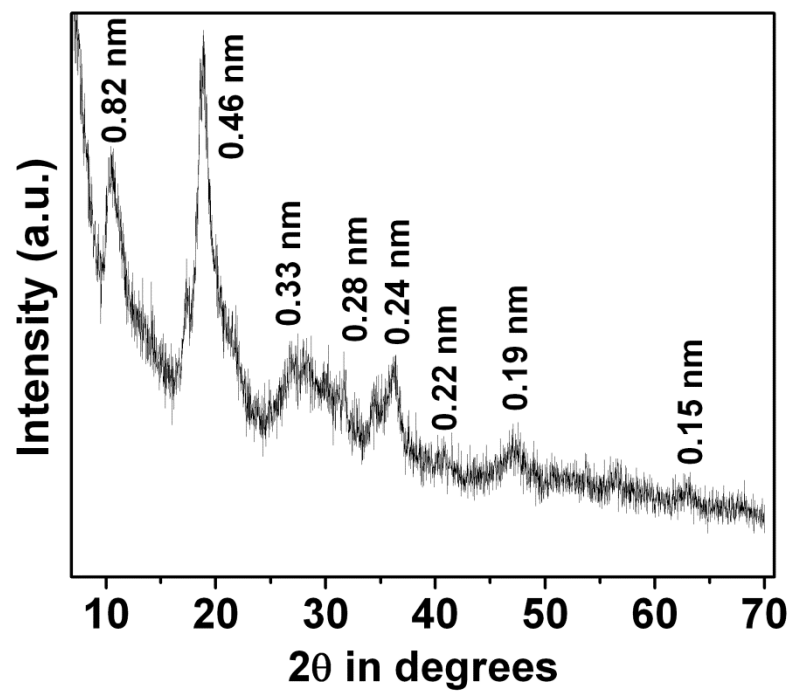

Figure S2. Wide angle XRD pattern of Zn@SBMMP



Figure S3

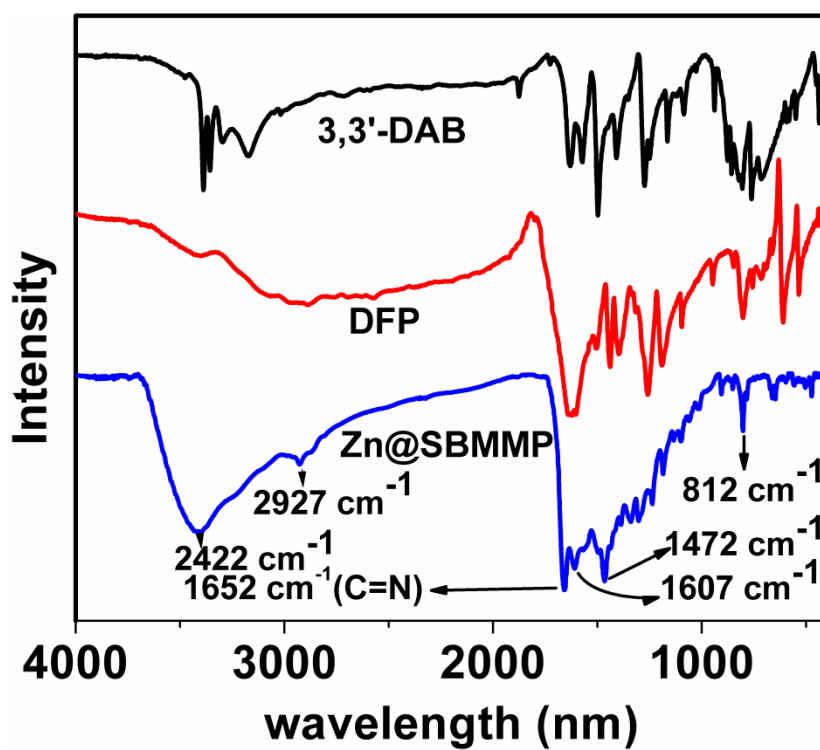

**Figure S3.** IR- spectra of 3,3' diaminobenzidine (3,3' DAB), Diformyl Phloroglucinol (DFP) & Zn@SBMMP material

**Figure S4**

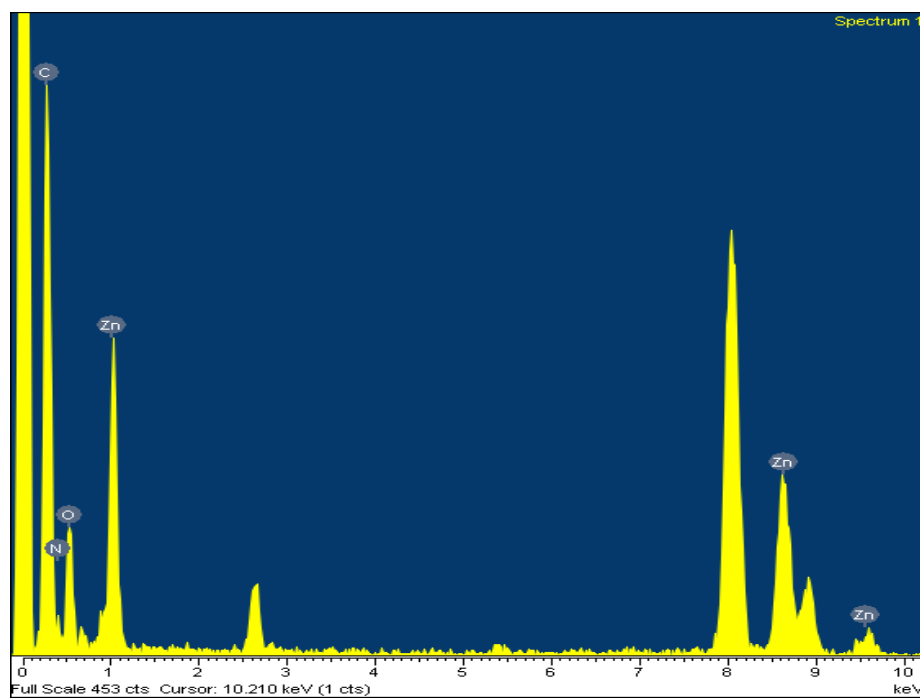

**Figure S4.** Energy dispersive X-ray(EDX) analysis data obtained from TEM analysis of Zn@SBMMP.

Figure S5

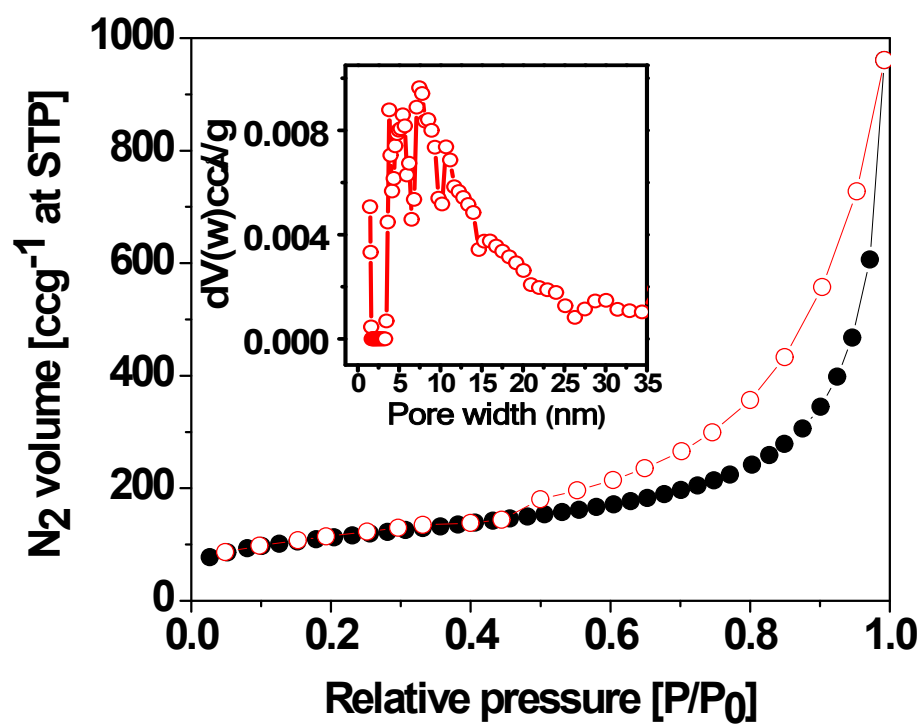

**Figure S5.** N<sub>2</sub> adsorption/desorption isotherms of Zn@SBMMP. Adsorption points are marked by filled circles and desorption points by empty circles. Pore sized distribution of Zn@SBMMP is shown in the inset.

Figure S6

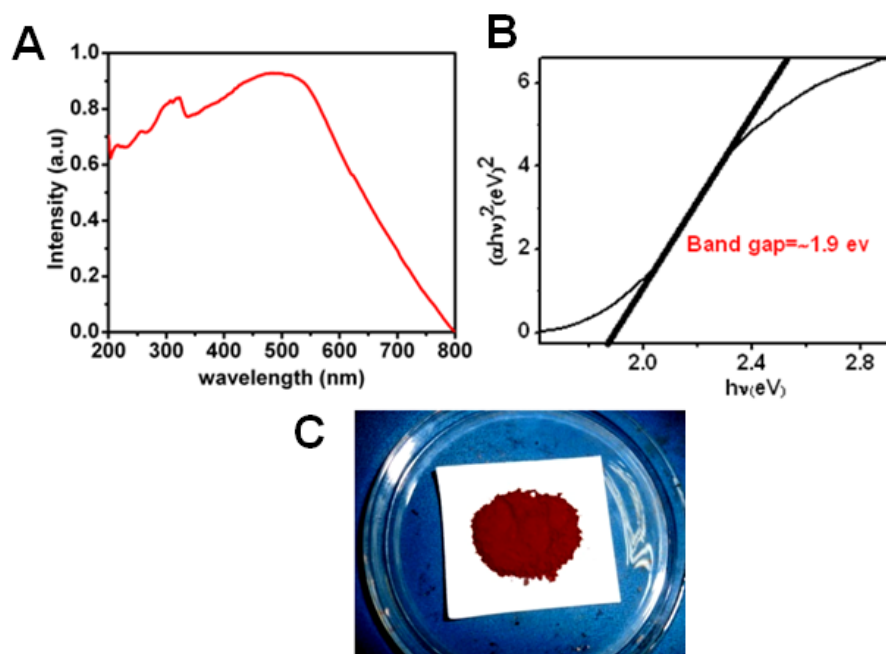

**Figure S6.** Solid state UV-Visible spectra(A) of Zn@SBMMP and band gap (B) and photograph of dark red colored powdered material(C).

Figure S7

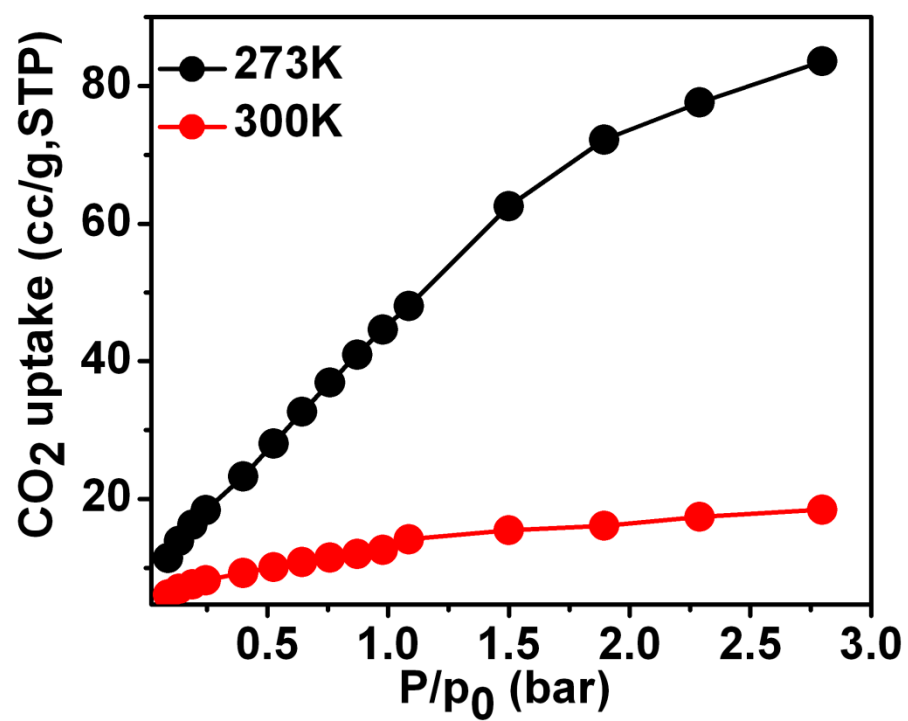

Figure S7.CO<sub>2</sub> adsorption isotherm at 273 K and 300 K by Zn@SBMMP upto 3 bar.

Figure S8

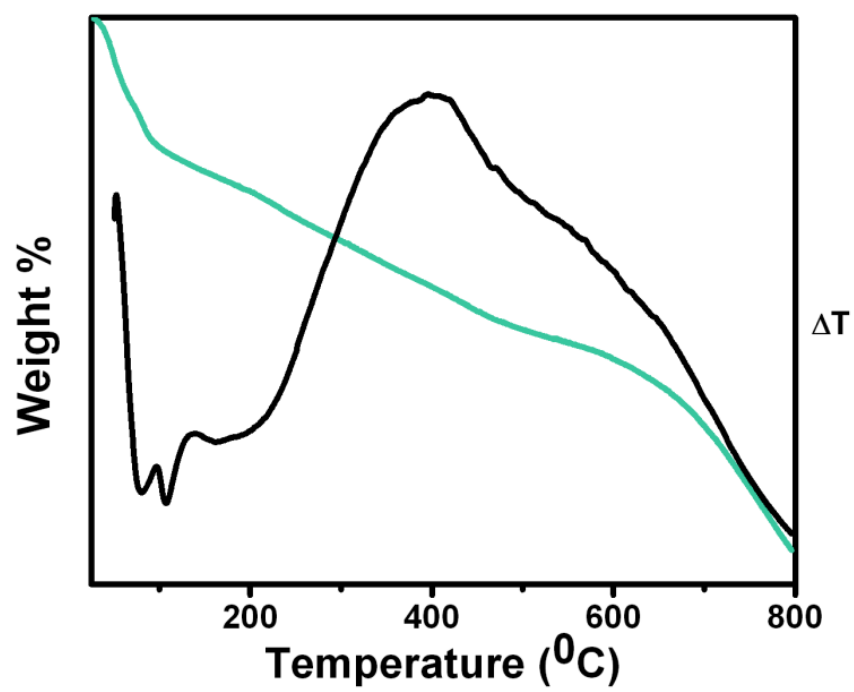

Figure S8 Thermogravimetric analysis of Zn@SBMMP.

## Section S2, Table-S1

### **Optimization of CO<sub>2</sub> capture and conversion efficiency of Zn@SBMMP using Styrene oxide (SO)**

The CO<sub>2</sub> conversion efficiency of Zn@SBMMP material was confirmed by the conversion of styrene oxide to styrene carbonate(SC). The high density of Zn-Salen unit was utilized for this cycloaddition reaction of CO<sub>2</sub> with epoxide under moderately mild condition without any solvent. The performance of this Zn@SBMMP catalyst was competitive with other zinc based homogenous and heterogeneous catalysts or catalytic system. This reaction had been done using only Zn(salen) complex afforded 27% SC using <sup>n</sup>Bu<sub>4</sub>N<sup>+</sup>Br<sup>-</sup>(TBAB) as a co-catalyst at 1.5 MPa and 70°C, 53% at 2 MPa and 90°C using dichloromethane as a solvent. The yield raised to 85% in presence of <sup>n</sup>Bu<sub>4</sub>N<sup>+</sup>I<sup>-</sup>(TBAI) as a co-catalyst expected. High conversion in milder conditions are very attracting for homogenous catalyst but these catalysis are associated with poor turn over number (TON) (ESI Sec. S3) value and no scope of reusability. Zn@SBMMP afforded 97% conversion at 2MPa and 100°C without using any solvent and 93% at initial pressure 1.5 MPa at 80°C in presence of solvent (25 ml) for SO(styrene oxide)/CO<sub>2</sub> coupling reaction(Table S1). In the absence of co-catalyst Zn@SBMMP gives 18% SC (styrene carbonate) and the co-catalyst. TBAB alone gives 35% .

| Entry | Catalyst (mg)         | Co-catalyst | CO <sub>2</sub> Pressure (MPa) <sup>f</sup> | Temperature (°C) | Time(h) | Yield <sup>¶</sup> (%) |
|-------|-----------------------|-------------|---------------------------------------------|------------------|---------|------------------------|
| 1.    | Zn-Salen complex (80) | TBAB        | 1.5                                         | 70               | 2       | 27                     |
| 2.    | Zn-Salen complex (80) | TBAB        | 2                                           | 90               | 4       | 53                     |
| 3.    | Zn-Salen complex(80)  | TBAI        | 2                                           | 90               | 4       | 85                     |
| 4.    | Zn@SBMM P (20)        | -           | 2                                           | 80               | 4       | 18                     |
| 5.    | -                     | TBAB        | 2                                           | 80               | 4       | 35                     |
| 6.    | Zn@SBMM P(20)         | TBAB        | 1.5                                         | 80               | 5       | 93                     |
| 7.    | Zn@SBMM P(20)         | TBAB        | 2                                           | 80               | 4       | 97                     |
| 8.    | KI(25)                | -           | 0.1                                         | 30               | 40      | 5                      |
| 9.    | KI(25)                | -           | 3                                           | 100              | 4       | 11                     |
| 10.   | KI/β-CD(25+150)       | -           | 0.1                                         | 30               | 40      | ~6                     |
| 11.   | KI/β-CD(25+150)       | -           | 3                                           | 100              | 4       | ~12                    |
| 12.   | ZIF-8(100)            | -           | 0.7                                         | 80               | 4       | 60                     |

**Table S1** □ Experimental condition- Styrene oxide (10 mmol), Zn@SBMMP (20mg, Zn: 0.04 mmol) or Zn-salen complex (80.0 mg, Zn: 0.122 mmol) or KI (20.3 mg, 0.15 mmol), dichloromethane (20 ml), unless otherwise noted.

<sup>f</sup>Initial pressure

<sup>¶</sup>Yield was calculated by GC-MS.



## Section S3, Figure S9

### Catalytic experimental procedure

A pre-dried 100-ml autoclave was charged with Zn@SBMMP (10- 30 mg) and Styrene Carbonate (1.2 g, 10 mmol), TBAB (1.8 mol%) in 20 ml dichloromethane at atmospheric pressure. Next, the assembled autoclave was purged of air three times with CO<sub>2</sub>. After the CO<sub>2</sub> (20 bar) was introduced, the reaction mixture was stirred at 80 °C for 4 h. The autoclave was cooled to room temperature and CO<sub>2</sub> was released. The reaction mixture was then dissolved with ethyl acetate (30 ml) and the insoluble solid material was filtered. Removing the solvent from the filtrate yielded a pale yellow oil substance. Further purification of the crude product was carried out by column chromatography (yield: 85–97%).

### Recyclability test with or without solvent

After each reaction the catalyst was filtered and dried in oven the further used for next cycle. The catalytic reaction was carried out in presence of solvent (DCM). The catalyst can be recycled atleast 10 times (Fig. S9B) and maximum 6 times without solvent ((Fig. S9A).

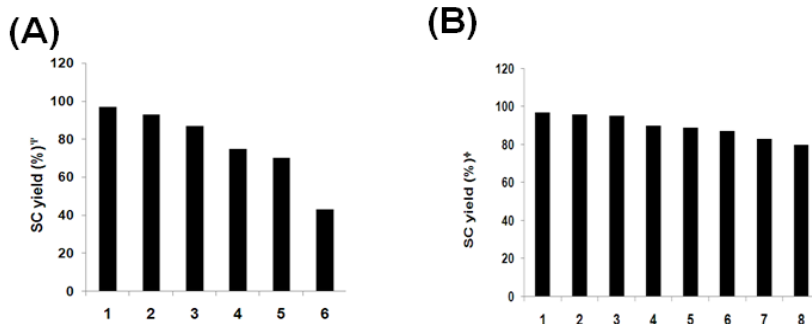

**Figure S9A.** <sup>Ψ</sup> reaction condition: 2 MPa and 80°C without Solvent

**Figure S9B.** <sup>Φ</sup> reaction condition: 2 MPa and 80°C using dichloromethane as a Solvent.

### Pressure and time variation

The influence of pressure and time on the styrene carbonate (SC) yield was monitored by conducting reaction at various pressure range between 0.3-6.0 MPa and time range between 1-8 h (Figure S9C). The temperature kept constant at 80°C throughout whole experiment due to very low catalytic activity at low temperature. When the reaction was carried out at 0.3 MPa, after 4 h the yield of SC was 43% and then the yield was increasing with the pressure of CO<sub>2</sub>. The yield was maximum 97% at 2.0 MPa. After that the yield was not varied significantly with the increment of pressure(6 MPa). The influence of reaction time on the SC yield has shown at Figure S9D is the reaction was conducted at 80°C and 1.5MPa . The yield of SC yield increased with increasing time at the beginning and approached 95% after a reaction time of 5h.

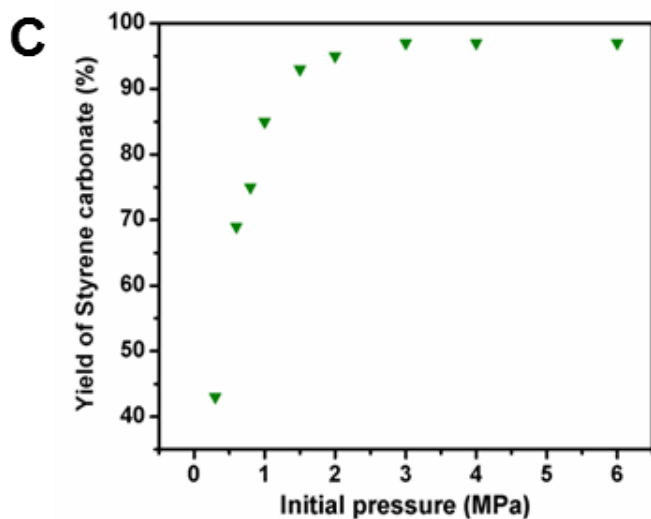

**Figure S9C.** Effect of the CO<sub>2</sub> pressure on the SC yield. Reaction conditions: 10 mmol SO with 1.8 mol% n-BuN<sub>4</sub>Br, 0.030g Zn@SBMMP, 30ml DCM, reaction temperature 80 °C, reaction time 4 h.

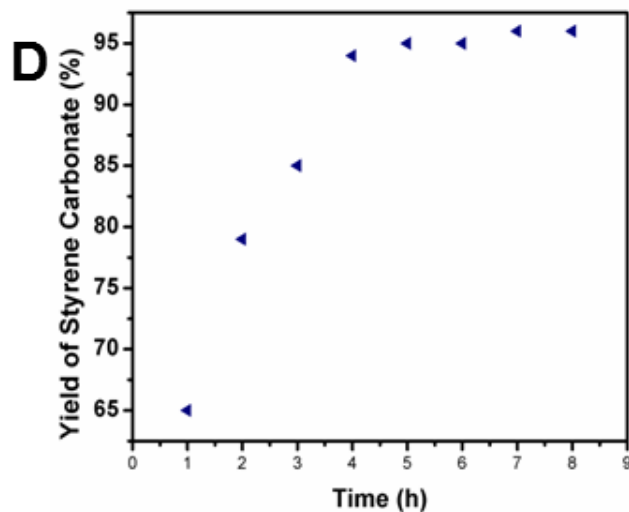

**Figure S9D.** The influence of the reaction time on the SC yield. Reaction conditions: 10 mmol SO with 1.8 mol% n-BuN<sub>4</sub>Br, 0.030g Zn@SBMMP, CO<sub>2</sub> pressure 1.5 MPa, reaction temperature 80 °C, 30ml DCM.

Turn over no. calculation

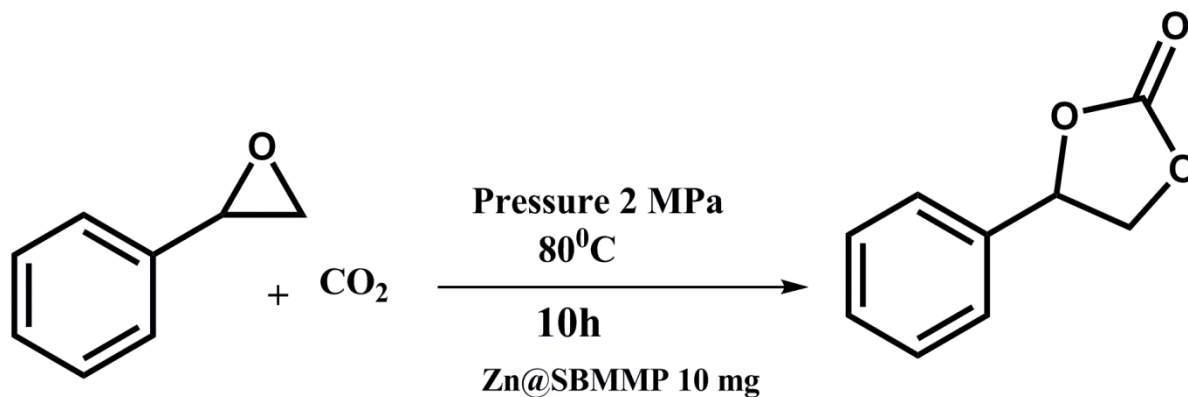

The Zinc content of Zn@SBMMP is 15.3 wt%

10 mg Zn@SBMMP contains  $1.5 \times 10^{-3} \text{ g} = 2.3 \times 10^{-5} \text{ Mol Zn}$ .

$$\text{Turn over number (TON)} = \frac{\text{Mols of Styrene carbonate obtained}}{\text{mols of Zinc}} = (9.5 \times 10^{-3}) / (2.3 \times 10^{-5}) = \mathbf{413}.$$

Figure S10

Proposed catalytic pathway

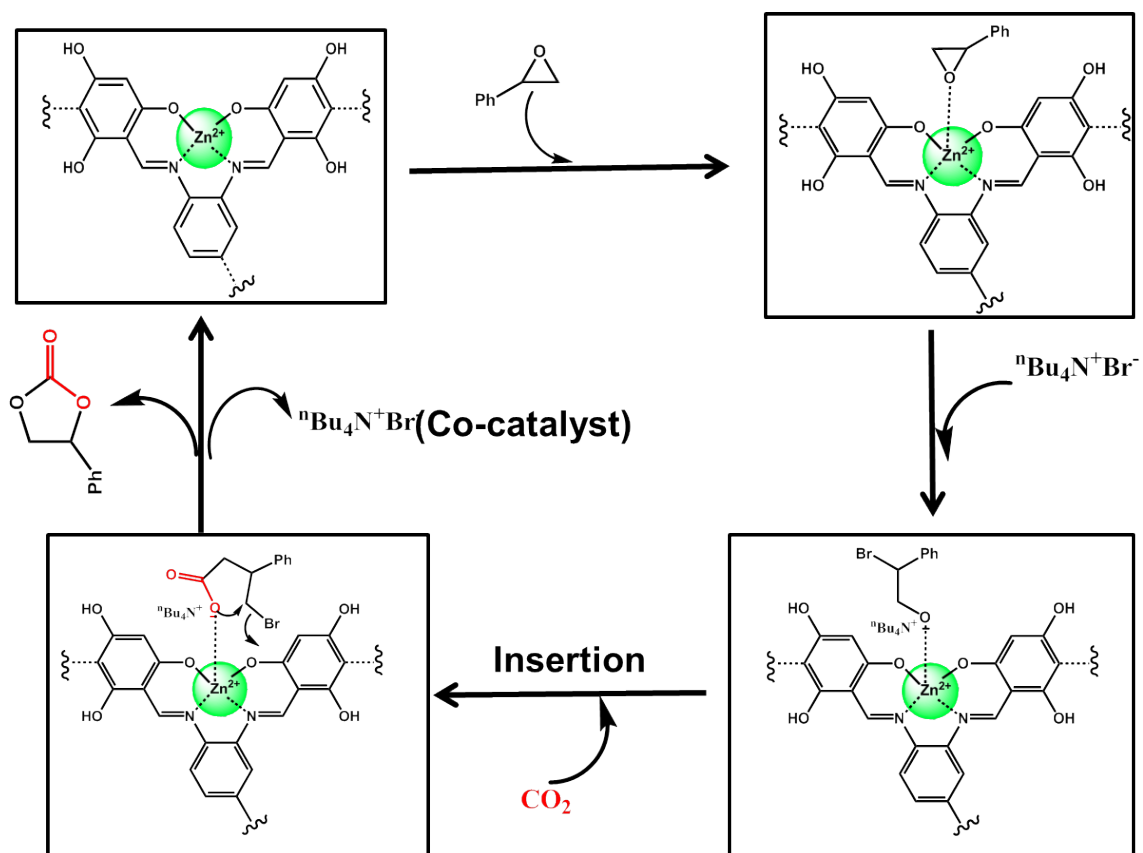

## Section S4, Figure S11

### TON value comparison with some homogeneous and heterogeneous catalyst

| Entry                                                           | Pressure (Mpa) | Temperature(°C) | Time (h) | TON    | Ref.      |
|-----------------------------------------------------------------|----------------|-----------------|----------|--------|-----------|
| binaphthyl diamino salenZn N(II) complex ( <b>homogeneous</b> ) | 3.5            | 100             | 2        | 30-901 | [2]       |
| Re(CO) <sub>5</sub> Br( <b>homogeneous</b> )                    | 6              | 110             |          | 850    | [3]       |
| PVP-SupportedZnBr <sub>2</sub> Catalyst( <b>Heterogeneous</b> ) | 3.5            | 100             | 1        | 201    | [4]       |
| Al(salen)/PEA( <b>Heterogeneous</b> )                           | 10             | 80              | 6        | 47     | [5]       |
| Al(salen)/PS( <b>Heterogeneous</b> )                            | 10             | 80              | 6        | 7      | [5]       |
| Co-CMP( <b>Heterogeneous</b> )                                  | 3              | 100             | 1        | 201    | [6]       |
| Al-CMP( <b>Heterogeneous</b> )                                  | 3              | 100             | 1        | 187    | [6]       |
| Zn@SBMMP( <b>Heterogeneous</b> )                                | 2              | 80              | 10       | 413    | This work |

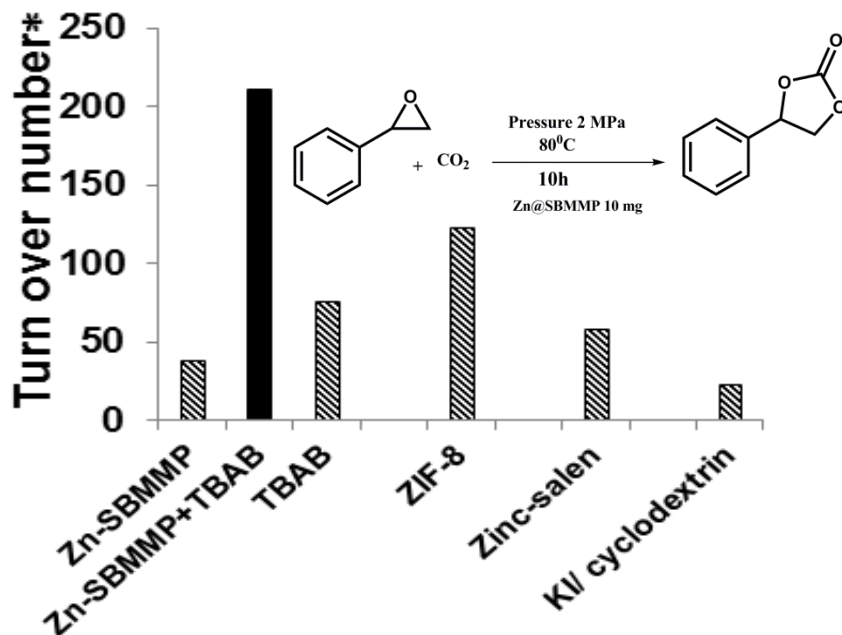

**Figure S11.** Catalytic efficiency of Zn@SBMMP vis-a-vis other Zn-catalysts in the CO<sub>2</sub> fixation reaction on styrene oxide.

## Section S5

### <sup>1</sup>H NMR data of cyclic carbonates

|                                                                                     |                                                                                                                                                                                                                                                                                                                                                                      |
|-------------------------------------------------------------------------------------|----------------------------------------------------------------------------------------------------------------------------------------------------------------------------------------------------------------------------------------------------------------------------------------------------------------------------------------------------------------------|
|    | <b>4-Methyl-1,3-dioxolan-2-one:</b> Colorless liquid, (hexane/ethyl acetate, 4:1 v/v); <sup>1</sup> H NMR (400 MHz, CDCl <sub>3</sub> ): δ=4.89–4.84 (m, 1H), 4.57 (dd, J=8.4, 7.8 Hz, 1H), 4.03 (dd, J=8.4, 7.2 Hz, 1H), 1.42 (d, J=6.3 Hz, 3H).                                                                                                                    |
|    | <b>4-Phenyl-1,3-dioxolan-2-one:</b> White solid, (hexane/ethyl acetate, 4:1 v/v); <sup>1</sup> H NMR (400 MHz, CDCl <sub>3</sub> ): δ=7.46–7.42 (m, 3H), 7.38–7.32 (m, 2H), 5.67 (t, J=8.1 Hz, 1H), 4.79 (dd, J=8.4, 8.1 Hz, 1H), 4.33 (dd, J=8.4, 8.1 Hz, 1H).                                                                                                      |
|   | <b>4-Chloromethyl-1,3-dioxolan-2-one:</b> Colorless liquid, (hexane/ethyl acetate, 7:1 v/v); <sup>1</sup> H NMR (400 MHz, CDCl <sub>3</sub> ): δ=5.02–4.96 (m, 1H), 4.611 (dd, J=9.0, 8.7 Hz, 1H), 4.43 (dd, J=8.7, 8.7 Hz, 1H), 3.83–3.72 (m, 2H).                                                                                                                  |
|  | <b>4-Phenoxyethyl-1,3-dioxolan-2-one:</b> White solid, (hexane/ethyl acetate, 4:1 v/v); <sup>1</sup> H NMR (400 MHz, CDCl <sub>3</sub> ): δ=7.328 (t, J=7.2 Hz, 2H), 6.987 (dd, J=7.8, 7.2 Hz, 1H), 6.89 (d, J=7.8 Hz, 2H), 5.05–4.99 (m, 1H), 4.62 (dd, J=8.4, 7.8 Hz, 1H), 4.37 (dd, J=8.4, 6.3 Hz, 1H), 4.24 (d, J=10.5 Hz, 1H), 4.16 (d, J=10.8 Hz, 1H).         |
|  | <b>4-Allyloxymethyl-1,3-dioxolan-2-one:</b> Colorless liquid, (hexane/ethyl acetate, 4:1 v/v); <sup>1</sup> H NMR (500 MHz, CDCl <sub>3</sub> ): δ=5.71 (ddt, J=17.4, 10.5, 5.7 Hz, 1H), 5.10 (dd, J=17.4, 1.5 Hz, 1H), 5.03 (dd, J=10.5, 1.5 Hz, 1H), 4.73–4.69 (m, 1H), 4.36 (t, J=8.4 Hz, 1H), 4.21 (t, J=8.4 Hz, 1H), 3.89 (d, J=5.7 Hz, 2H), 3.56–3.43 (m, 2H). |
|  | <b>4-Butoxymethyl-1,3-dioxolan-2-one:</b> Colorless liquid, (hexane/ethyl acetate, 15:1 v/v); <sup>1</sup> H NMR (300 MHz, CDCl <sub>3</sub> ): δ=4.84–4.76 (m, 1H), 4.49 (dd, J=8.4, 8.1 Hz, 1H), 4.39 (dd, J=8.4, 8.4 Hz, 1H), 3.69–3.57 (m, 2H), 3.50 (t, J=6.6 Hz, 2H), 1.65–1.50 (m, 2H), 1.35 (dt, J=14.4, 7.2 Hz, 2H), 0.91 (dd, J=7.5, 7.2 Hz, 3H).          |
|  | <b>4-(hydroxymethyl)-1,3-dioxolan-2-one:</b> <sup>1</sup> H NMR (300 MHz, CDCl <sub>3</sub> ) δ 4.82 (ddd, J = 11.3, 6.6, 3.2 Hz, 1H), 4.59 – 4.43 (m, 2H), 4.00 (ddd, J = 12.8, 5.0, 2.9 Hz, 1H), 3.72 (ddd, J = 12.8, 6.6, 3.4 Hz, 1H), 2.80 (br s, 1H).                                                                                                           |

## Section S6

Some representative  $^1\text{H}$  NMR spectra of cyclic carbonates.

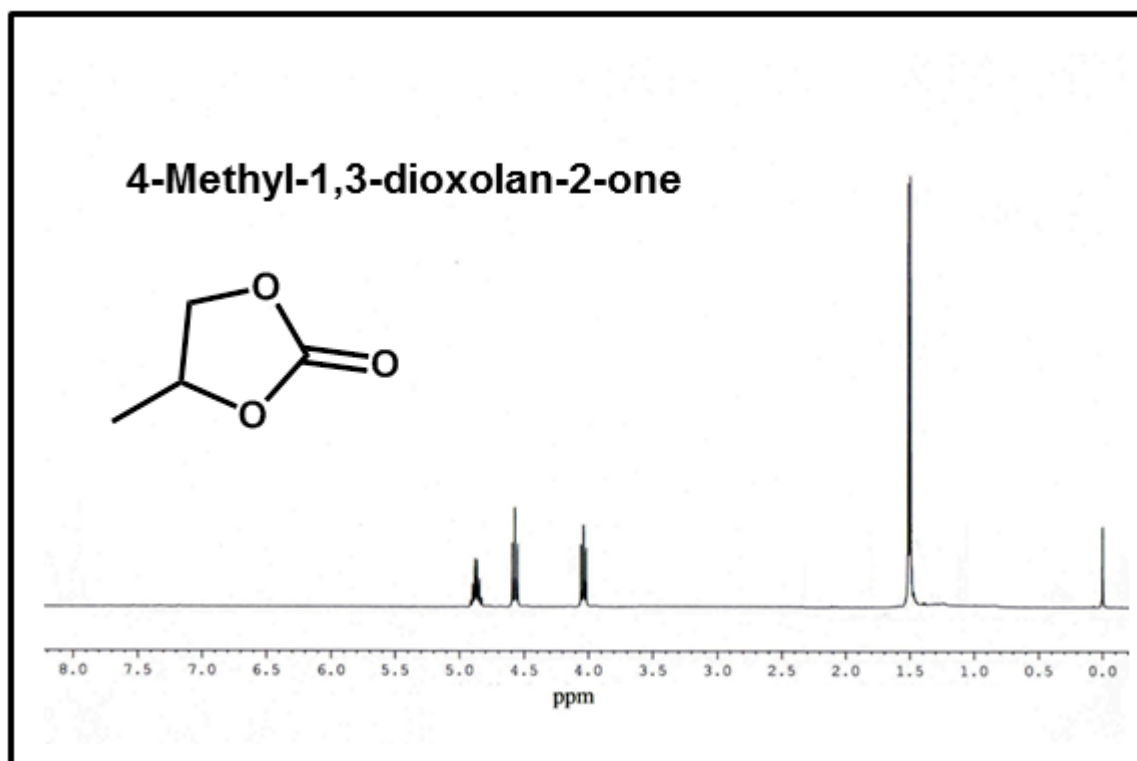

# 4-Chloromethyl-1,3-dioxolan-2-one

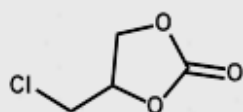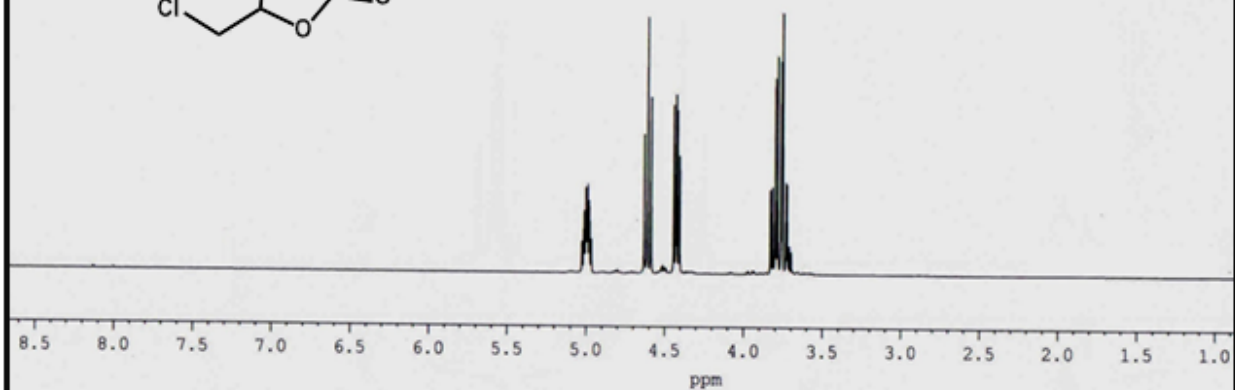



#### 4-Phenoxymethyl-1,3-dioxolan-2-one

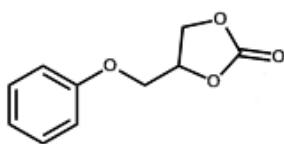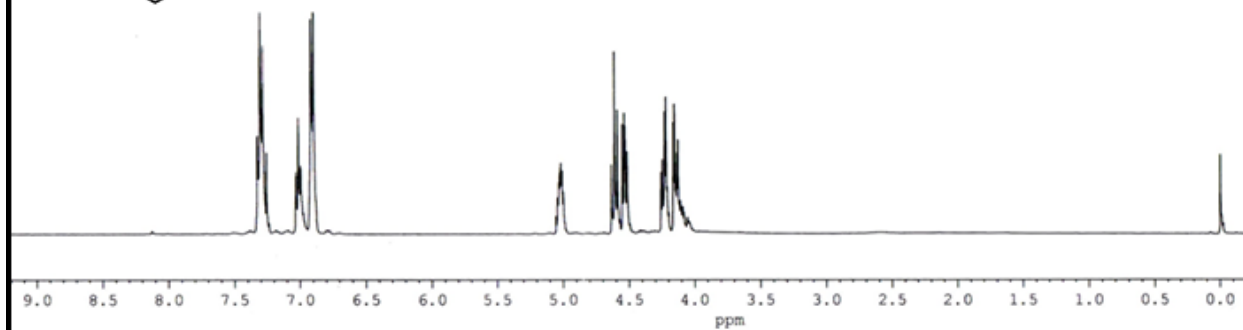

**4-Phenyl-1,3-dioxolan-2-one**

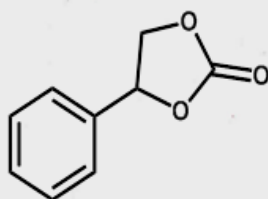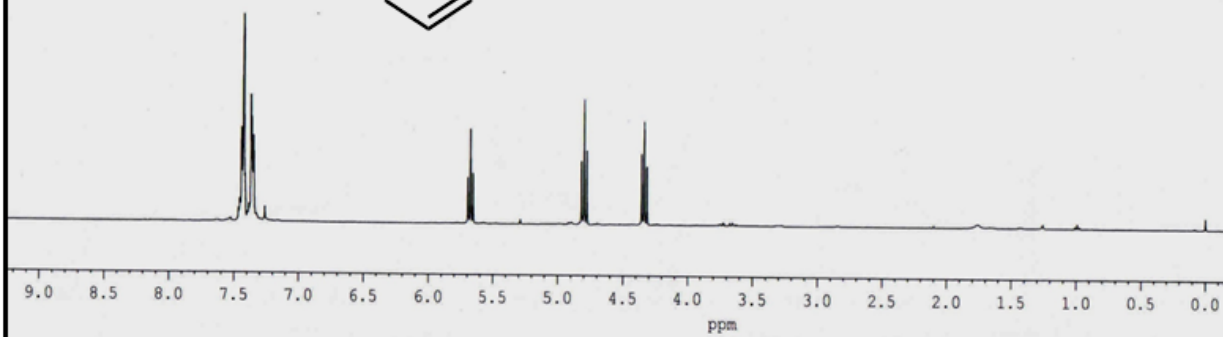

**4-Allyloxymethyl-1,3-dioxolan-2-one**

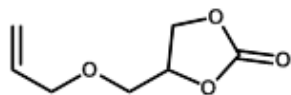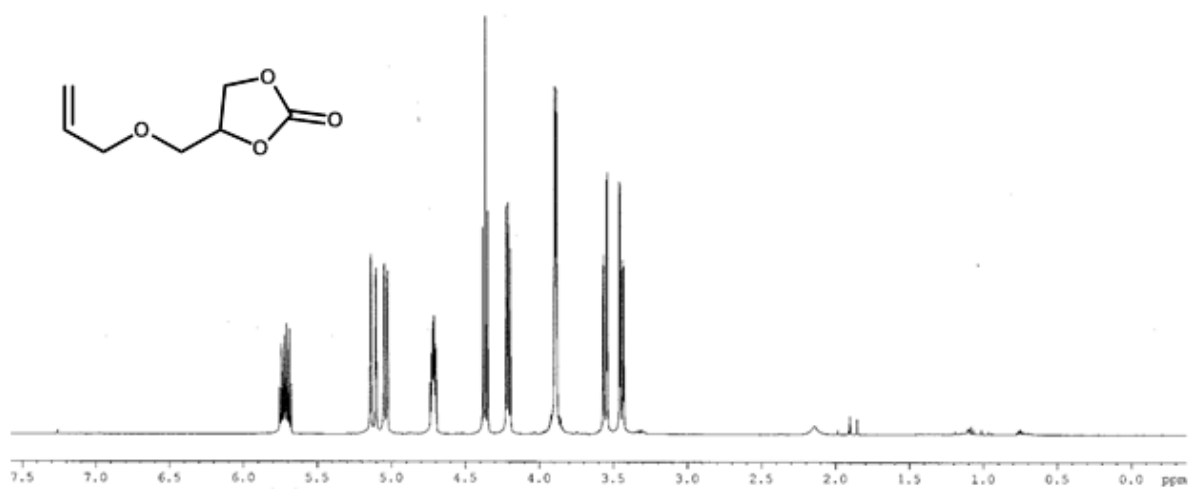

## Section S7

### Reference

1. A. L. Lawrence , R. M. Adlington , J. E. Baldwin , V. Lee, J. A. Kershaw and A. L. Thompson, *Org. Lett.* 2010, **12** , 1676–1679.
2. Y.-M. Shen , W.-L. Duan and M. Shi, *J. Org. Chem.*, 2003, **68** , 1559–1562.
3. J.-L. Jiang, F. Gao, R. Hua and X. Qiu, *J. Org. Chem.*, 2005, **70**, 381-383.
4. Michael Ramin, Jan-Dierk Grunwaldt and Alfons Baiker, 2005, **234**, 256-267
5. M. Alvaro, C. Baleizao, E. Carbonell, M. E. Ghoul, H. Garcí' and Barbara Gigante, 2005, **61**, 12131-12139.
6. Y. Xie, T.-T. Wang, X.-H. Liu, K. Zou and W.-Q. Deng, *Nat. Commun.* 2013, **4**, 1960.
